# Supplementary material for: A closer look into the microbiome of microalgal cultures
Source: PubMed Central journal article supplement (PMC9908576; doi:10.3389/fmicb.2023.1108018), 2023-01-26

## *Supplementary Material*

### A closer look into the microbiome of microalgal cultures

Pia Steinrücken\*, Steve Jackson, Oliver Müller, Pål Puntervoll, Dorinde M.M. Kleinegris

\* **Correspondence:** Pia Steinrücken: [pias@norceresearch.no](mailto:pias@norceresearch.no)

**Supplementary Table S1. Final nutrient concentration in Conway and NORCE medium.** In the NORCE medium micronutrients were added through a fertilizer (YaraTera REXOLIN APN, Bor 0.85%, Copper 0.25%, Iron 6%, Manganese 2.4%, Molybdenum 0.25%, Zink 1.3%), Cu, Mn and Zn are chelated with EDTA, and Fe with DTPA. In Conway micronutrients are chelated with EDTA.

| Conway                                                                              | Molarity (mmol/L) | NORCE                                                           | Molarity (mmol/L) |
|-------------------------------------------------------------------------------------|-------------------|-----------------------------------------------------------------|-------------------|
| <b>Macronutrients</b>                                                               |                   | <b>Macronutrients</b>                                           |                   |
| Nitrate (NaNO <sub>3</sub> )                                                        | 1.177             | Nitrate (NaNO <sub>3</sub> )                                    | 12.47             |
| Phosphate (NaH <sub>2</sub> PO <sub>4</sub> · H <sub>2</sub> O)                     | 0.113             | Phosphate (KH <sub>2</sub> PO <sub>4</sub> )                    | 0.88              |
| Silicate (Na <sub>2</sub> SiO <sub>3</sub> · 5H <sub>2</sub> O)                     | 0.141             | Silicate (Na <sub>2</sub> SiO <sub>3</sub> · 5H <sub>2</sub> O) | 0.14              |
| <b>Micronutrients</b>                                                               |                   | <b>Trace mineral mix</b>                                        |                   |
| H <sub>3</sub> BO <sub>3</sub>                                                      | 0.543             | Boron (B)                                                       | 0.031             |
| CoCl <sub>2</sub> · 6H <sub>2</sub> O                                               | 0.00008           |                                                                 |                   |
| CuSO <sub>4</sub> · 5H <sub>2</sub> O                                               | 0.00008           | Copper (Cu)                                                     | 0.002             |
| FeCl <sub>3</sub> · 6H <sub>2</sub> O                                               | 0.008             | Iron (Fe)                                                       | 0.043             |
| MnCl <sub>2</sub> · 4H <sub>2</sub> O                                               | 0.002             | Manganese (Mn)                                                  | 0.017             |
| (NH <sub>4</sub> ) <sub>6</sub> Mo <sub>7</sub> O <sub>24</sub> · 4H <sub>2</sub> O | 0.0000073         | Molybdenum (Mo)                                                 | 0.001             |
| ZnCl <sub>2</sub>                                                                   | 0.00015           | Zink (Zn)                                                       | 0.008             |
| <b>Vitamins</b>                                                                     |                   | <b>Vitamins</b>                                                 |                   |
| B1                                                                                  | 0.000297          | B1                                                              | 0.000297          |
| B12                                                                                 | 0.0000037         | B12                                                             | 0.0000037         |
| Biotin                                                                              | 0.000021          | Biotin                                                          | 0.000021          |

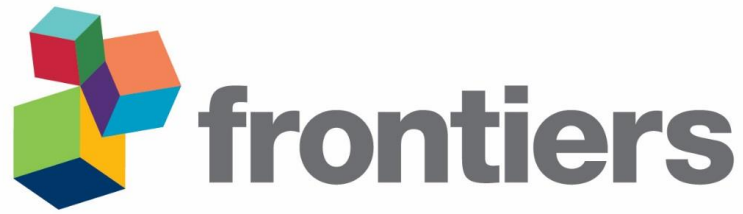

Supplement: Table_1.pdf [file Table_1.pdf]
