# Supplementary material for: A closer look into the microbiome of microalgal cultures
Source: PubMed Central journal article supplement (PMC9908576; doi:10.3389/fmicb.2023.1108018), 2023-01-26

## Supplementary Material

### A closer look into the microbiome of microalgal cultures

Pia Steinrücken\*, Steve Jackson, Oliver Müller, Pål Puntervoll, Dorinde M.M. Kleinegris

\* **Correspondence:** Pia Steinrücken: pias@norceresearch.no

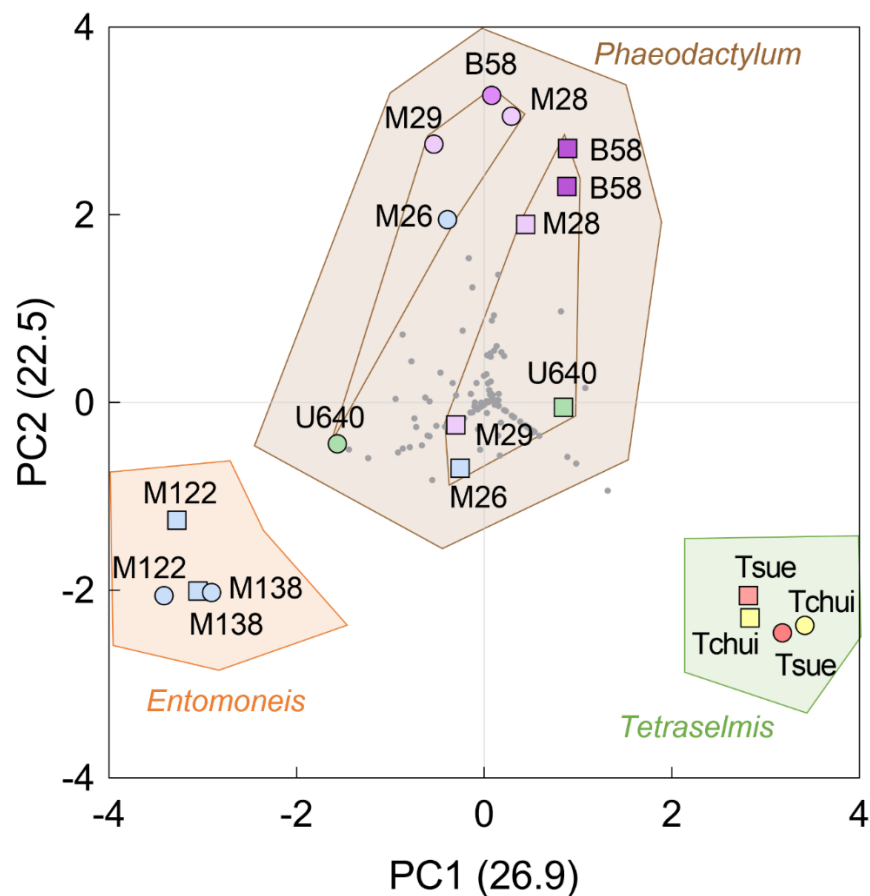

**Supplementary Figure S1. Principal component analysis (PCA) of the normalized bacterial community composition data for 18 microalgal stock cultures (nine strains, two growth media).** All sequenced OTUs were included in the calculations and are shown as grey dots. Circles indicate Conway and squares NORCE medium. For *Phaeodactylum* stock cultures inner connecting lines indicate two distinct subclusters defined by culture medium (Conway or NORCE). Colors for circles and squares indicate different sampling habitats with blue: Store Lungegårdsvann, Bergen; green: Arctic; light purple: Puddefjorden, Bergen, 2014; dark purple: Puddefjorden, Bergen, 1997; grey: England; yellow: Scotland; red: Italy.

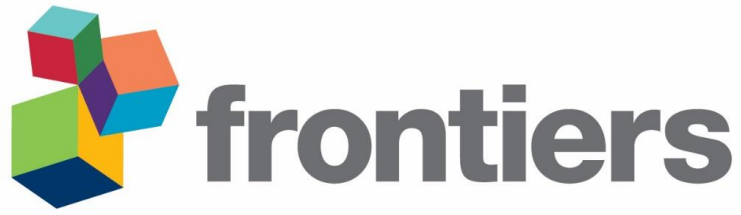

Supplement: Image_1.pdf [file Image_1.pdf]
