# Supplementary material for: A closer look into the microbiome of microalgal cultures
Source: PubMed Central journal article supplement (PMC9908576; doi:10.3389/fmicb.2023.1108018), 2023-01-26

## *Supplementary Material*

### A closer look into the microbiome of microalgal cultures

Pia Steinrücken\*, Steve Jackson, Oliver Müller, Pål Puntervoll, Dorinde M.M. Kleinegris

\* **Correspondence:** Pia Steinrücken: [pias@norceresearch.no](mailto:pias@norceresearch.no)

**Supplementary Table S2. Irradiance ( $\mu\text{mol m}^{-2} \text{s}^{-1}$ ) and culture densities (OD 750, average of two technical replicates) during batch cultivation in bubble columns of three *Phaeodactylum* strains (duplicates). Strains were grown in a Multi-Cultivator MC 1000-OD until stationary phase was reached, and irradiance was increased progressively with increasing OD 750.**

| Strain        |            | Day 0 | Day 1 | Day 2 | Day 3 | Day 4 | Day 5 | Day 6 | Day 7 | Day 8 | Day 9 | Day 10 |
|---------------|------------|-------|-------|-------|-------|-------|-------|-------|-------|-------|-------|--------|
| <b>B58_1</b>  | Irradiance | 30    | 30    | 30    | 60    | 60    | 200   | 300   | 500   | 500   | 500   | 500    |
|               | OD 750     | ~ 0.1 | 0.12  | 0.23  | 0.74  | 1.39  | 3.17  | 5.21  | 8.12  | 11.10 | 10.93 | 12.68  |
| <b>B58_2</b>  | Irradiance | 30    | 30    | 30    | 60    | 60    | 200   | 300   | 500   | 500   | 500   | 500    |
|               | OD 750     | ~ 0.1 | 0.11  | 0.22  | 0.68  | 1.23  | 2.92  | 4.98  | 8.00  | 9.68  | 10.55 | 9.95   |
| <b>M28_1</b>  | Irradiance | 30    | 30    | 30    | 60    | 60    | 200   | 300   | 500   | 500   | 500   | 500    |
|               | OD 750     | ~ 0.1 | 0.15  | 0.27  | 0.80  | 1.54  | 4.09  | 5.40  | 8.66  | 11.23 | 12.10 | 12.00  |
| <b>M28_2</b>  | Irradiance | 30    | 30    | 30    | 60    | 60    | 200   | 300   | 500   | 500   | 500   | 500    |
|               | OD 750     | ~ 0.1 | 0.14  | 0.28  | 0.87  | 1.72  | 4.19  | 5.77  | 8.66  | 11.58 | 12.73 | 13.03  |
| <b>U640_1</b> | Irradiance | 30    | 30    | 30    | 60    | 60    | 100   | 200   | 300   | 500   | 500   | -      |
|               | OD 750     | ~ 0.1 | 0.11  | 0.19  | 0.80  | 0.94  | 2.25  | 3.44  | 5.16  | 5.60  | 4.48  | -      |
| <b>U640_2</b> | Irradiance | 30    | 30    | 30    | 60    | 60    | 100   | 200   | 300   | 500   | 500   | -      |
|               | OD 750     | ~ 0.1 | 0.10  | 0.17  | 0.54  | 0.76  | 1.65  | 2.62  | 3.80  | 5.60  | 4.58  | -      |

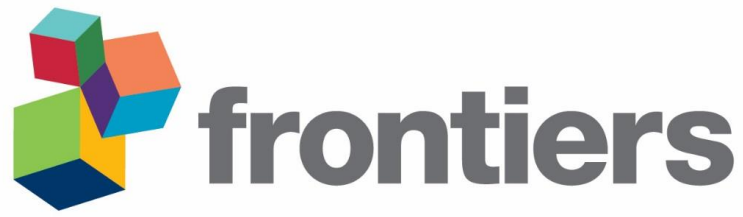

Supplement: Table_2.pdf [file Table_2.pdf]
